# Supplementary material for: Exendin-4 Improves Long-Term Potentiation and Neuronal Dendritic Growth in High-Fat Diet Mice and Neurons Under Metabolic Imbalance Conditions
Source: Research Square preprint supplement (doi:10.21203/rs.3.rs-109387/v1), 2020-11-24

# **Exendin-4 improves long-term potentiation and neuronal dendritic growth in high-fat diet mice and neurons under metabolic imbalance conditions**

Ming Wang<sup>1+</sup>, Gwangho Yoon<sup>2+</sup>, Juhyun Song<sup>2\*</sup>, Jihoon Jo<sup>1,3,4\*</sup>

<sup>1</sup>Department of Biomedical Sciences, BK21 PLUS Center for Creative Biomedical Scientists at Chonnam National University, Research Institute of Medical Sciences, Chonnam National University Medical School, Gwangju 501-757, Republic of Korea

<sup>2</sup>Department of Anatomy, Chonnam National University Medical School, Hwasun 58128, Jeollanam-do, Republic of Korea

<sup>3</sup>NeuroMedical Convergence Lab, Biomedical Research Institute, Chonnam National University Hospital, Jebong-ro, Gwangju 501-757, Republic of Korea

<sup>4</sup>Department of Neurology, Chonnam National University Medical School, Gwangju 501-757, Republic of Korea

<sup>+</sup> These authors equally contributed to this study

## **\*Correspondence to:**

Juhyun Song, Ph.D., Department of Anatomy, Chonnam National University Medical School, Hwasun 58128, Jeollanam-do, Republic of Korea, Tel: +82-61-379-2706; E-mail: [juhyunsong@chonnam.ac.kr](mailto:juhyunsong@chonnam.ac.kr)

Jihoon Jo, Ph.D., Department of Biomedical Sciences, Chonnam National University Medical School, 61469, 160, Baekseo-ro, Dong-gu, Gwangju, Republic of Korea, Tel: +82-(0)62-220-4419; E-mail:

[Jihoon.Jo@chonnam.ac.kr](mailto:Jihoon.Jo@chonnam.ac.kr)

# Supplementary Information

Full-length blots for **Figure 2d**

**PSD-95, 95kDa**

Hippocampal neuron

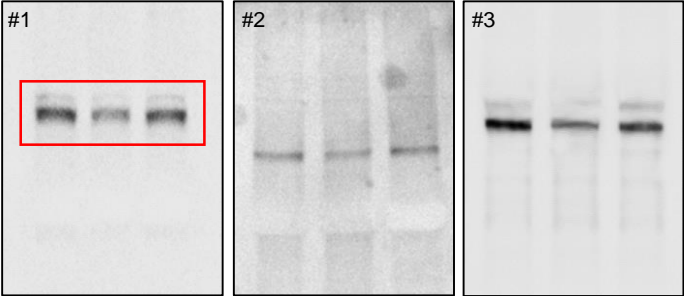

Cortical neuron

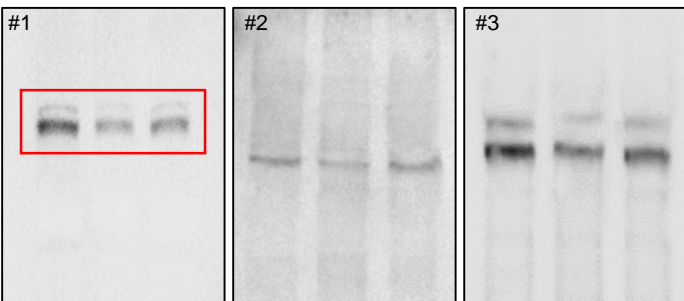

**$\beta$ -actin, 43kDa**

Hippocampal neuron

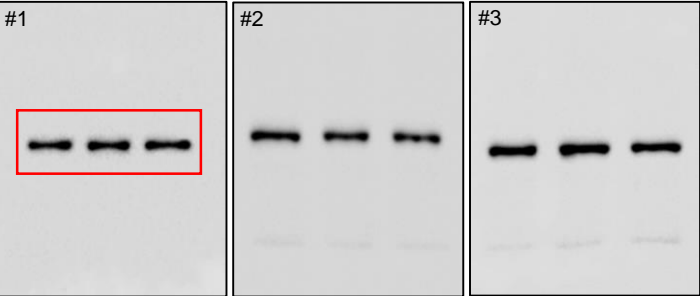

Cortical neuron

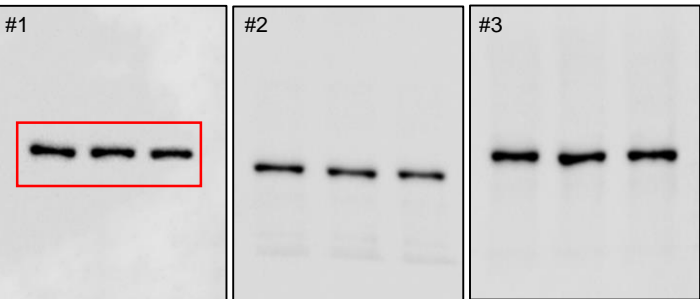

# Supplementary Information

## Full-length blots for Figure 3a and Figure 3b

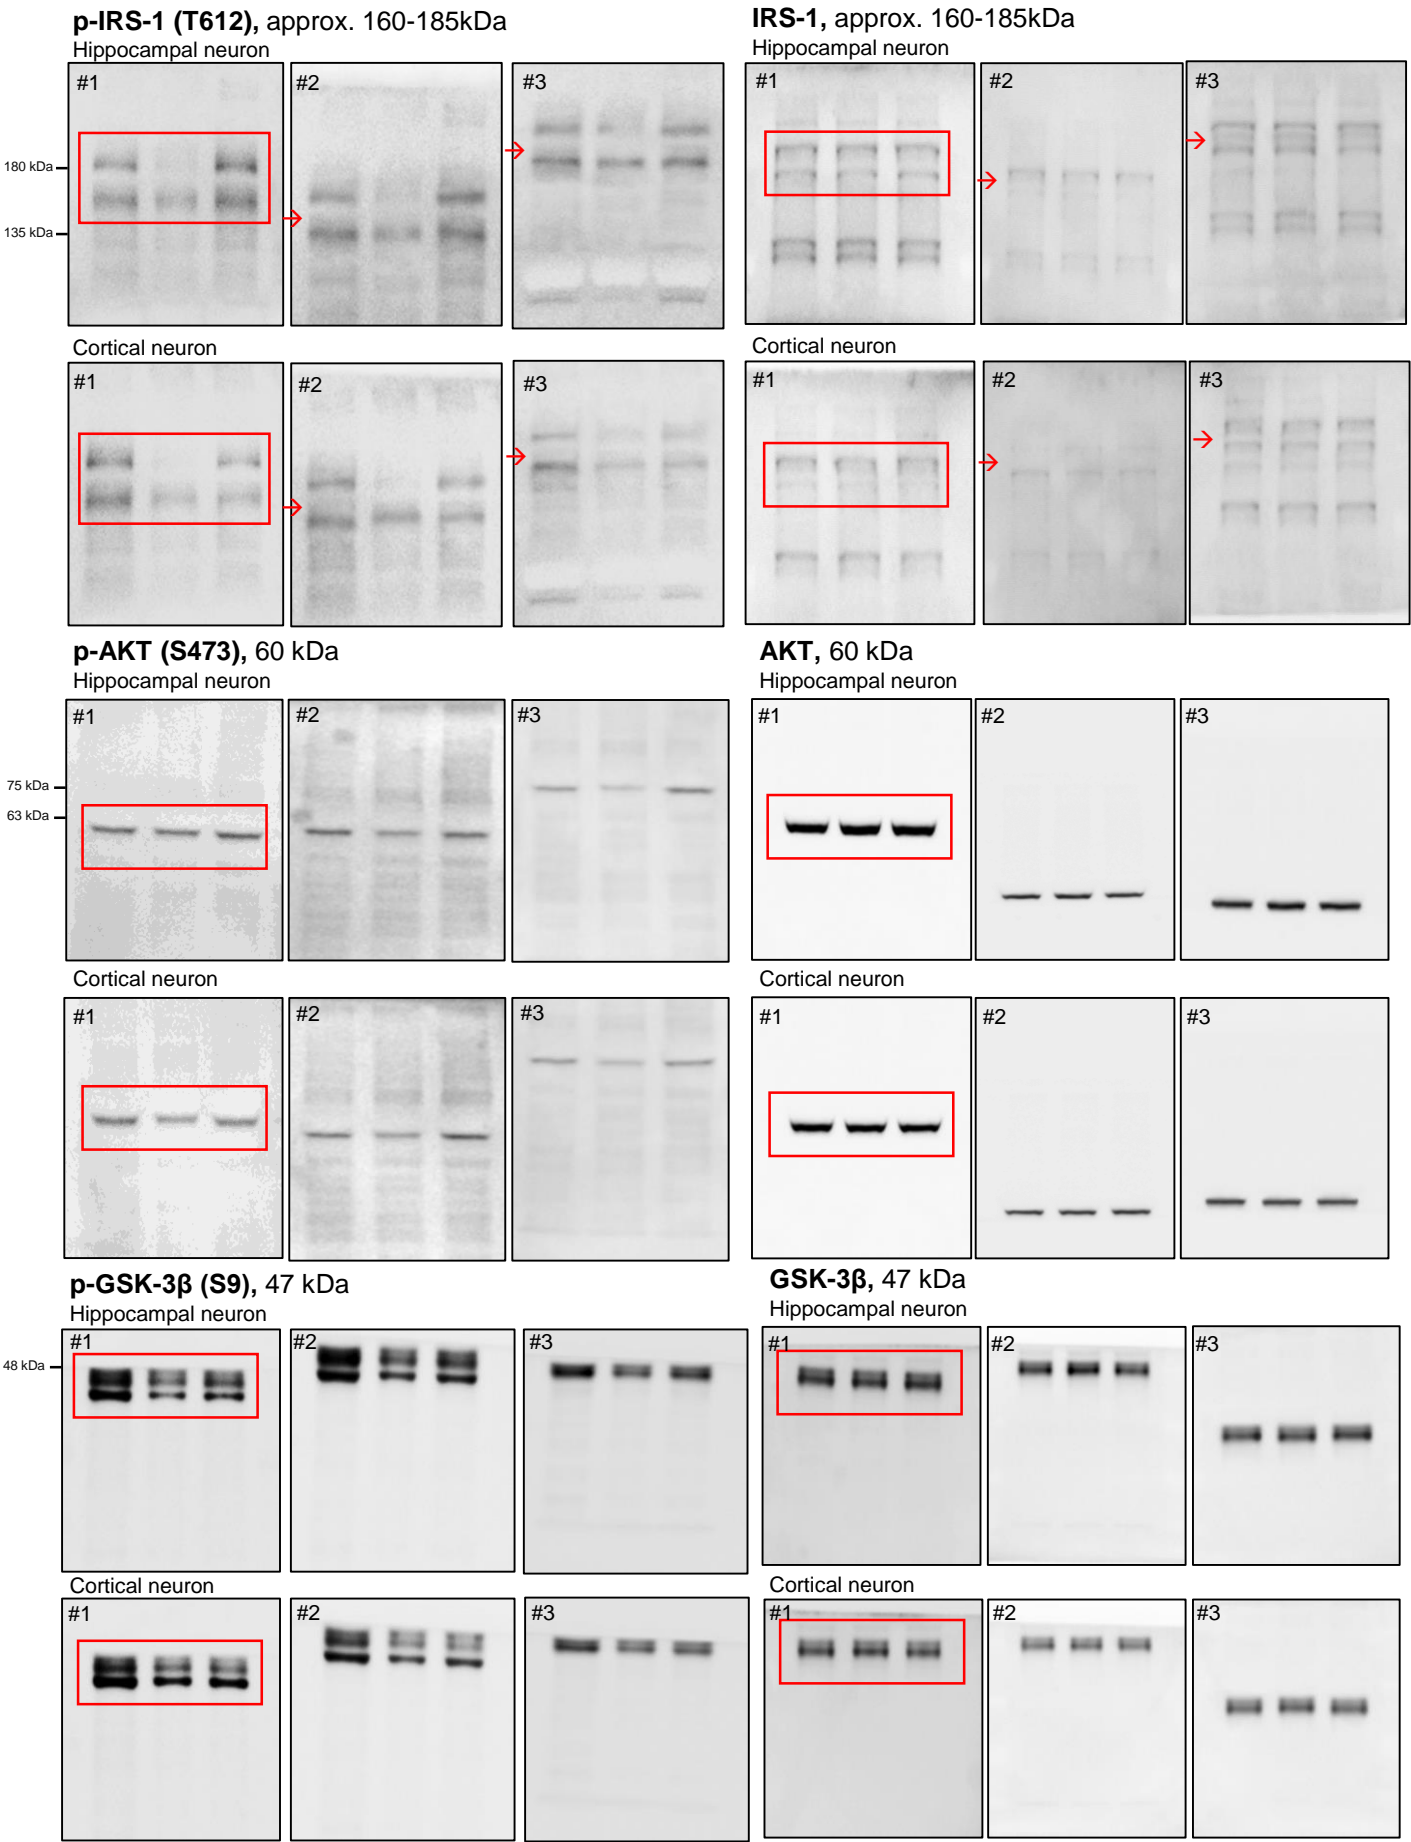

# Supplementary Information

Full-length blots for **Figure 3a** and **Figure 3b**

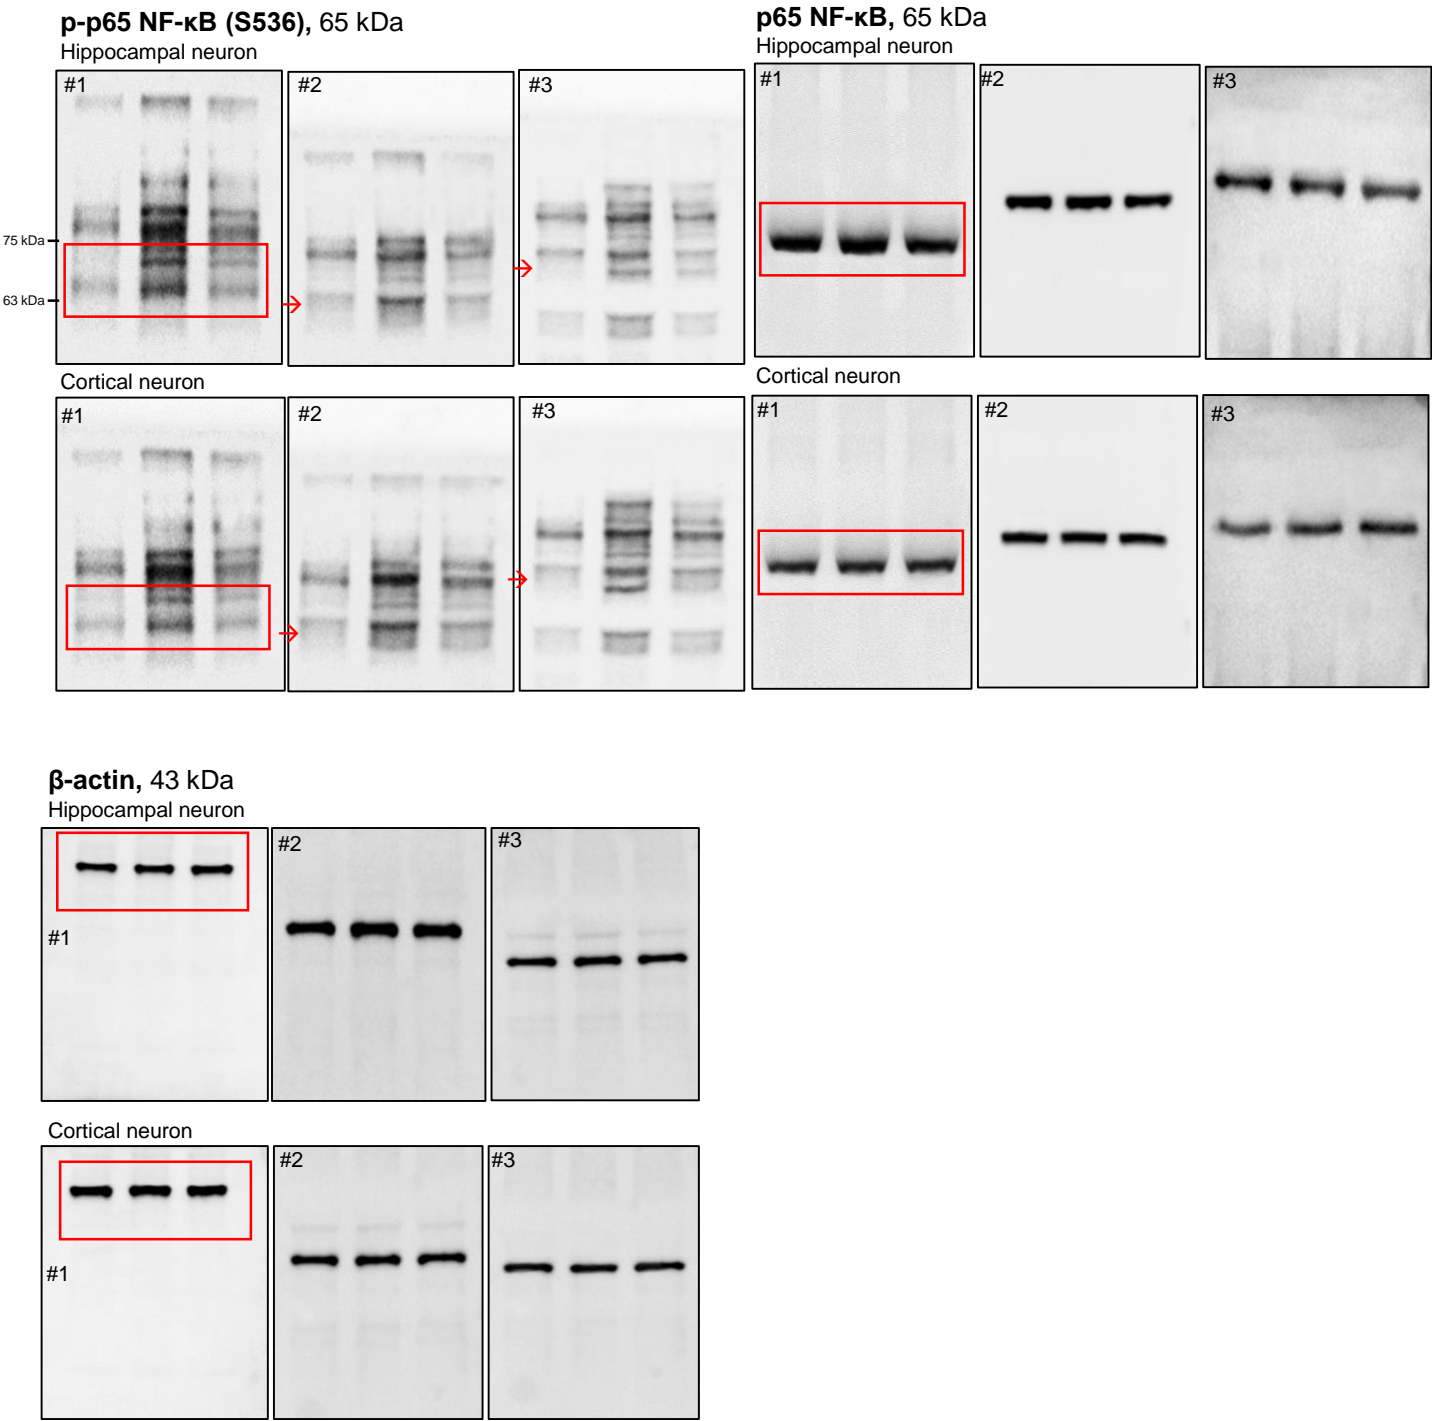

# Supplementary Information

Full-length blots for **Figure 4a**

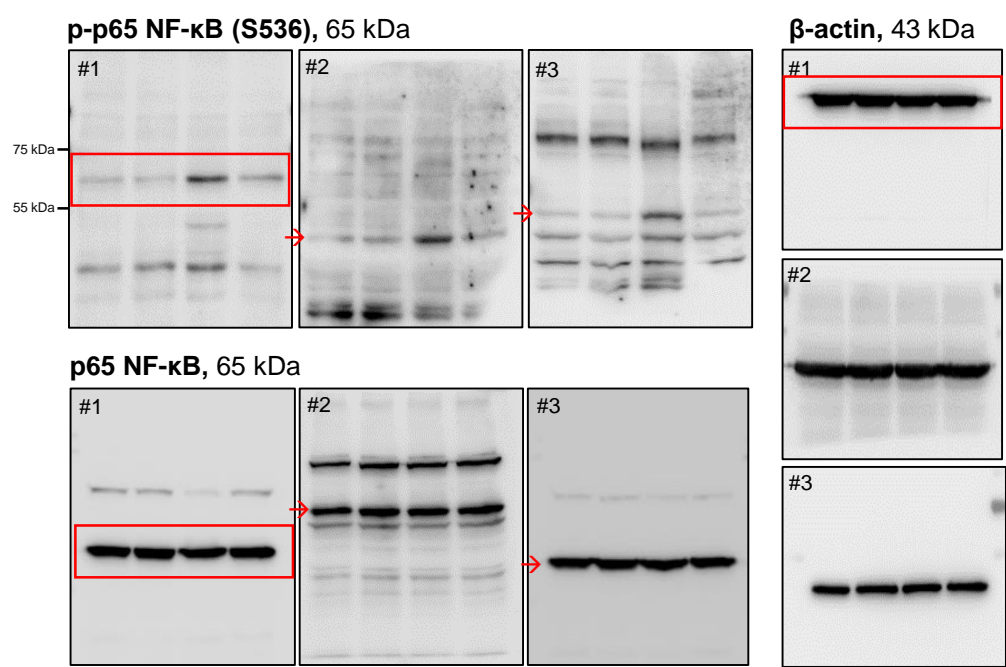

Full-length blots for **Figure 4b**

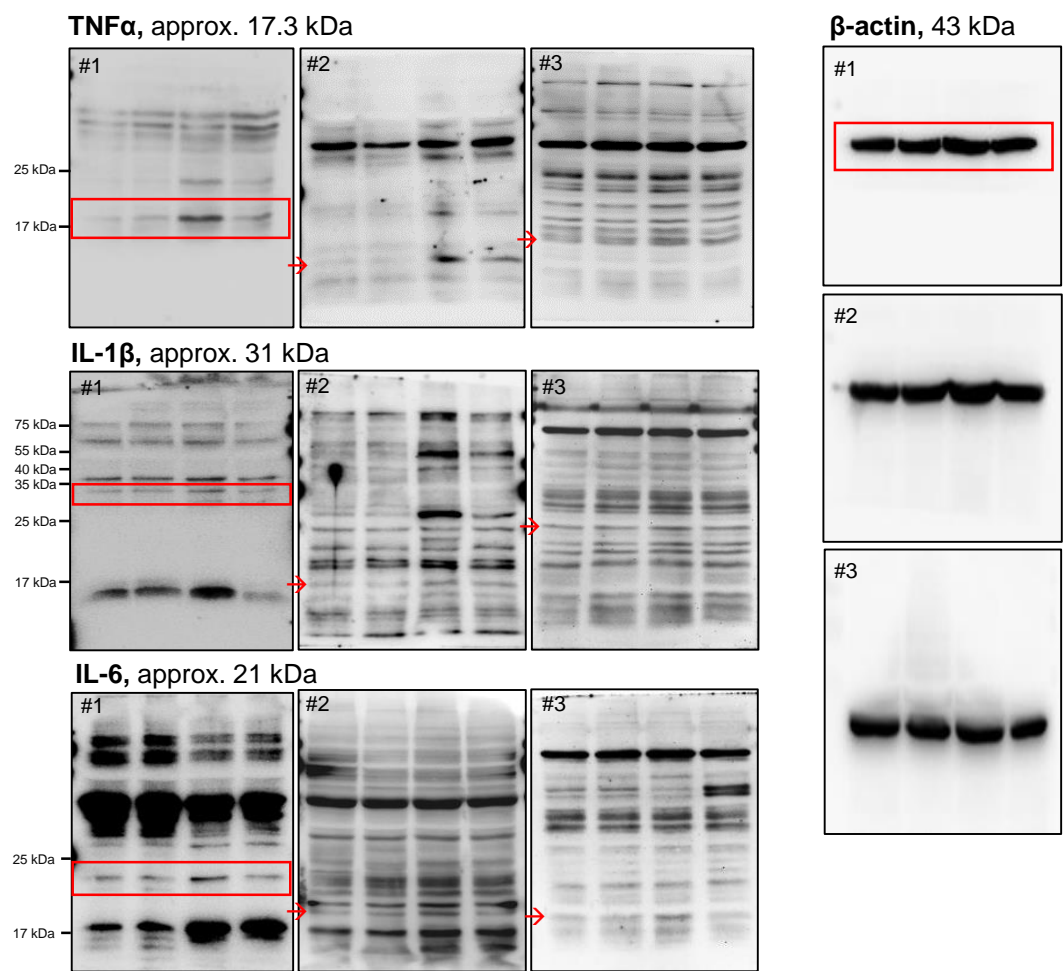

# Supplementary Information

Full-length blots for **Figure 4c**

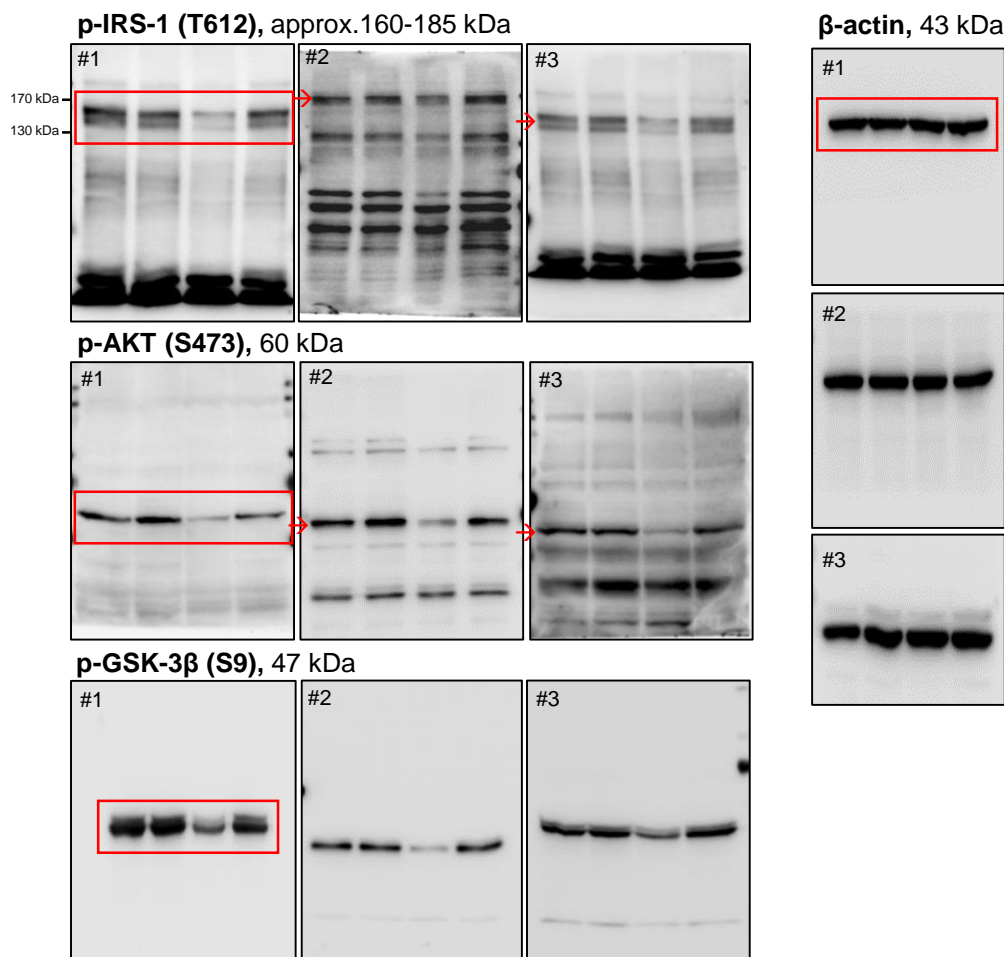

Full-length blots for **Figure 5d**

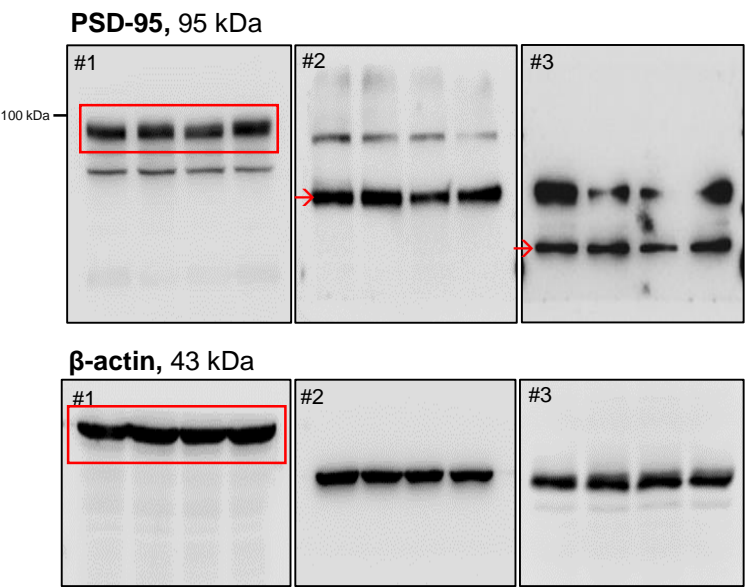

Supplement: Supplementary file 1 [file a4d84bd891c80960dd505460.pdf]
